# Supplementary material for: Research on the Electron Structure and Antimicrobial Properties of Mandelic Acid and Its Alkali Metal Salts
Source: MDPI journal article supplement (doi:10.3390/ijms24043078), 2023-02-04
Supplement: s1 [file s1]

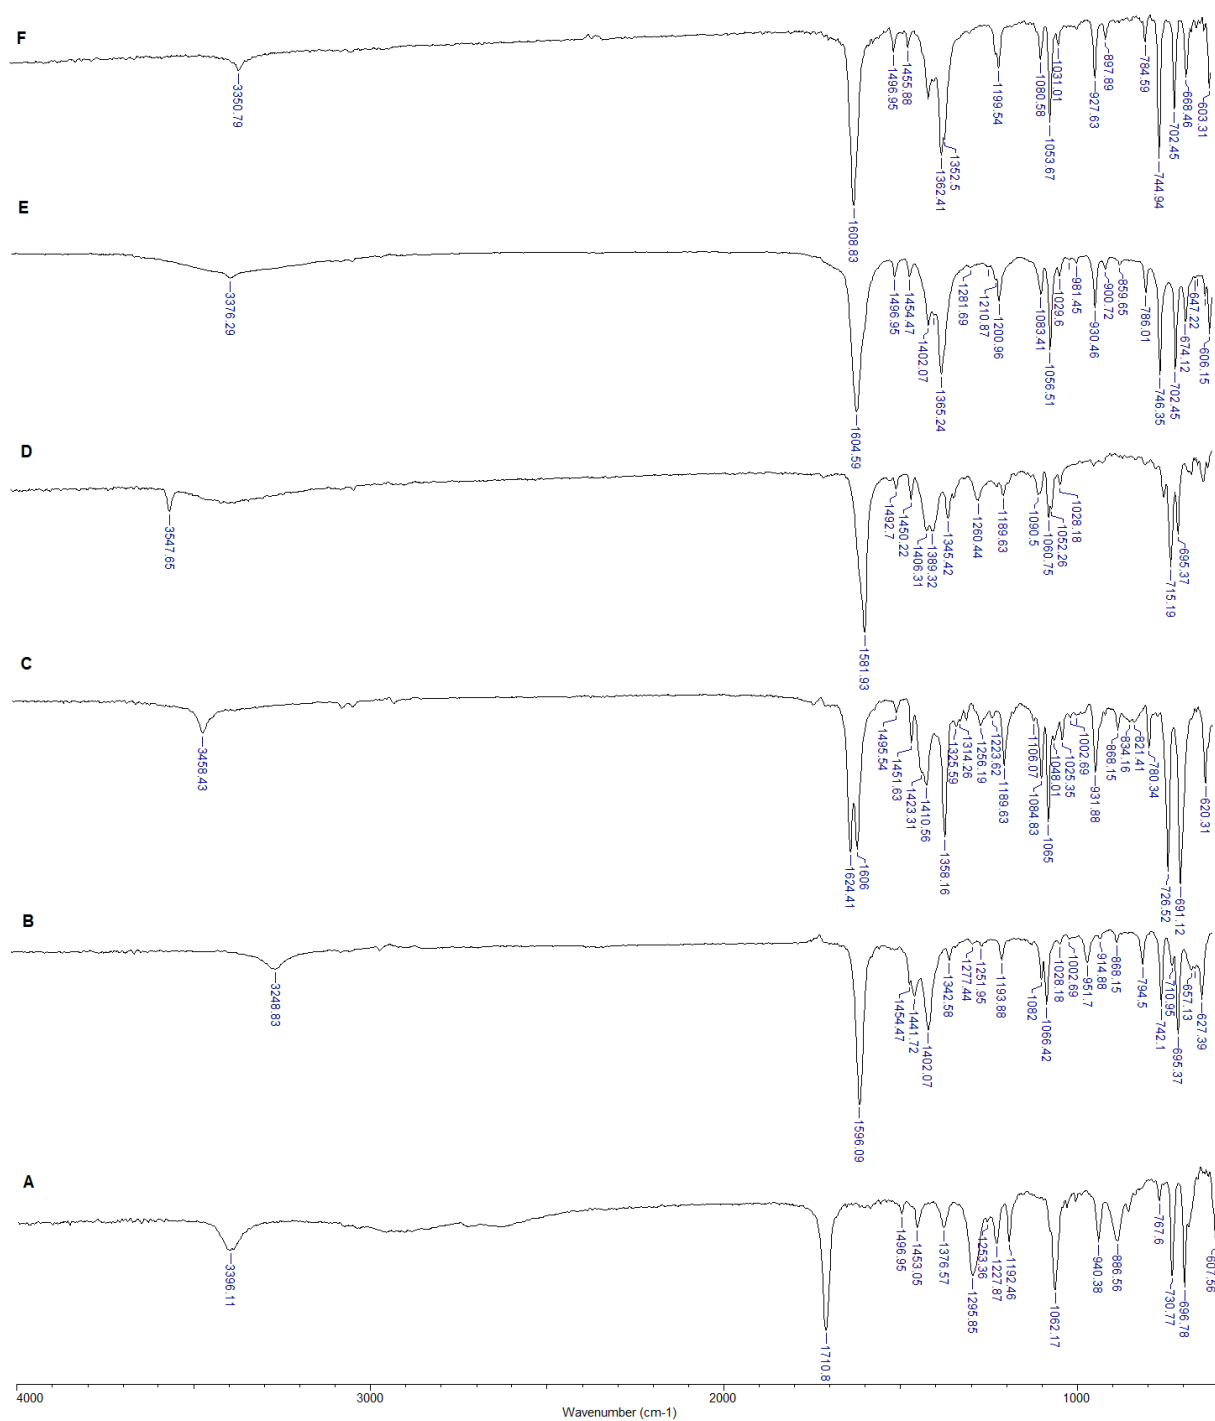

Figure S1. FTIR ATR spectra for mandelic acid (A) and lithium (B), sodium (C), potassium (D), rubidium (E), cesium mandelate (F)

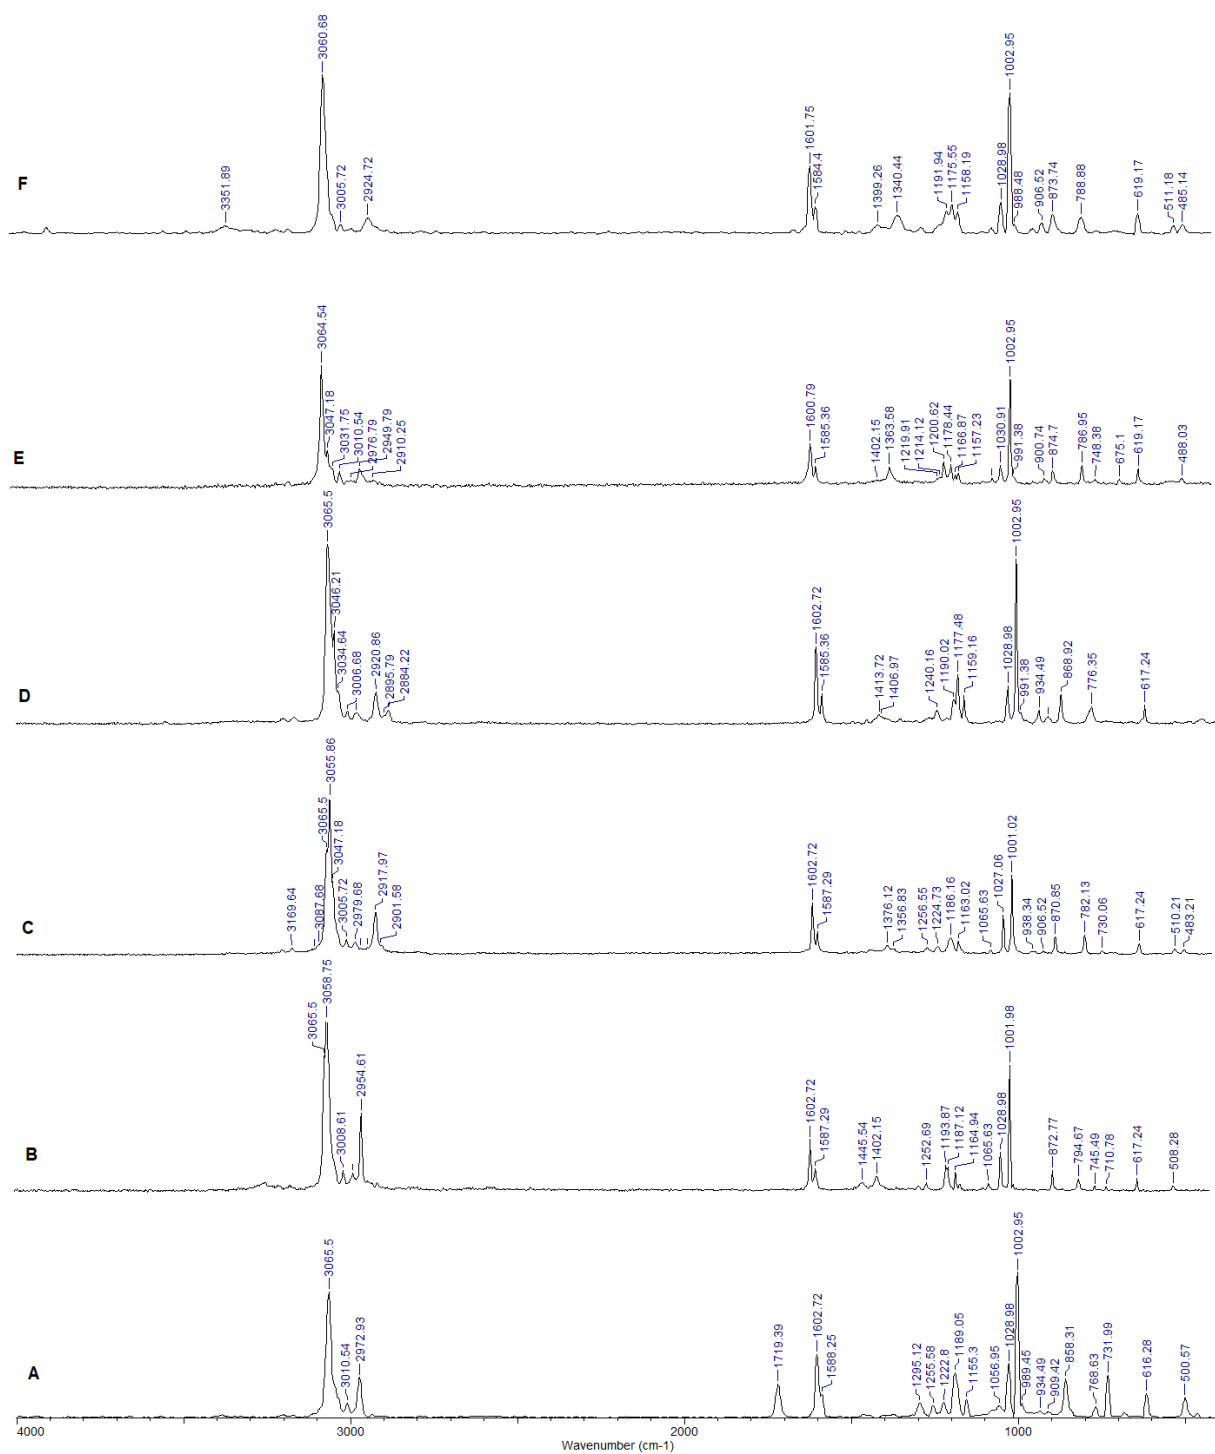

Figure S2. Raman spectra for mandelic acid (A) and lithium (B), sodium (C), potassium (D), rubidium (E), cesium mandelate (F)
